# Supplementary material
Source: ML conference proceedings conference paper supplement (https://openaccess.thecvf.com/content/CVPR2026/html/Shen_MERLIN_Building_Low-SNR_CVPR_2026_paper.html)
Supplement: Supplementary file 1 [file Shen_MERLIN_Building_Low-SNR_CVPR_2026_supplemental.pdf]

## A. Appendix

### A.1. Overview of Appendix

This appendix provides supplementary details for our pre-trained baseline, dataset, and benchmark. Due to space constraints in the main paper, additional technical specifics can only be accommodated here.

The organization is as follows:

- Sec. A.2: More implementation details of baseline model.
- Sec. A.3: Datasheets for benchmark.
- Sec. A.4: SNR Robustness: Pretrain Model vs. MERLIN.
- Sec. A.5: Visualizations of samples.

### A.2. Implementation Details of Baseline Model

We utilized EM-134K as the supervised fine-tuning (SFT) dataset. The pre-trained model is derived from Qwen3-4B-Instruct-2507, to which we first integrated a signal encoder (SIT) that embeds IQ signal data into feature vectors. These feature vectors serve as a second modality input alongside text into the LLM.

During two-stage training, we perform full fine-tuning in the first stage to align signal and text semantics. In the second stage, we apply knowledge distillation fine-tuning to enhance the model’s robustness under low-SNR conditions, where the LLM parameters are frozen and only the signal encoder and projection layers are trained.

Table 4. **Training configuration details for MERLIN framework.** Hyperparameters used during the two-stage training. SIT = Signal Integration Transformer encoder.

| Configuration            | Parameter Value                                                     |
|--------------------------|---------------------------------------------------------------------|
| Dataset (Stage 1)        | EM-134K (134K instruction pairs)                                    |
| Dataset (Stage 2)        | Synthetic low-SNR variants (SNR = $-20\text{dB}$ to $20\text{dB}$ ) |
| Batch Size               | 256                                                                 |
| LR: Signal Encoder (SIT) | $5.0 \times 10^{-5}$ (cosine decay)                                 |
| LR: Projector, LLM       | $5.0 \times 10^{-5}$                                                |
| Optimizer                | AdamW ( $\beta_1 = 0.9, \beta_2 = 0.999, \epsilon = 1\text{e-}8$ )  |
| Training Epochs          | Stage 1: 8 epochs, Stage 2: 8 epochs                                |
| Hardware                 | $8 \times$ NVIDIA A100 80GB                                         |

### A.3. Datasheets for benchmark

Table 5. **Overview of the EM-Bench evaluation framework.** The benchmark features a three-level hierarchy spanning Perception and Reasoning, consisting of 14 distinct L3-Tasks. Each sub-task contains 300 samples, totaling 4,200 VQA pairs. The table lists the specific abbreviations, data quantities, and answer types (Single Choice vs. Open-ended Strategy) for each task.

| L1-Task    | L2-Task                 | L3-Task                               | Abbr.   | Annotation Format | Number of Samples | Answer Type              |
|------------|-------------------------|---------------------------------------|---------|-------------------|-------------------|--------------------------|
| Perception | Signal Characterization | Modulation Classification             | MOD     | VQA               | 300               | Single Choice(A/B/C/D/E) |
|            |                         | Duty Cycle Estimation                 | PE.DC   | VQA               | 300               | Single Choice(A/B/C/D/E) |
|            |                         | Pulse Repetition Frequency Estimation | PE.PRF  | VQA               | 300               | Single Choice(A/B/C/D/E) |
|            |                         | Bandwidth Estimation                  | PE.BW   | VQA               | 300               | Single Choice(A/B/C/D/E) |
|            |                         | Pulse Width Estimation                | PE.PW   | VQA               | 300               | Single Choice(A/B/C/D/E) |
|            |                         | Pulse Number Estimation               | PE.NoP  | VQA               | 300               | Single Choice(A/B/C/D/E) |
|            |                         | Protocol Identification               | PI      | VQA               | 300               | Single Choice(A/B/C/D/E) |
|            | Jamming Identification  | Radar Jamming Judgement               | RJR     | VQA               | 300               | Single Choice(A/B/C/D/E) |
|            |                         | Communication Jamming Judgement       | CJR     | VQA               | 300               | Single Choice(A/B/C/D/E) |
|            | Segment Detection       | Jamming Segment Detection             | SD      | VQA               | 300               | Single Choice(A/B/C/D/E) |
| Reasoning  | Strategy Generation     | Anti-Communication Jamming Strategy   | Anti-CJ | VQA               | 300               | Open-end Strategy        |
|            |                         | Anti-Radar Jamming Strategy           | Anti-RJ | VQA               | 300               | Open-end Strategy        |
|            |                         | Communication Jamming Strategy        | CJS     | VQA               | 300               | Open-end Strategy        |
|            |                         | Radar Jamming Strategy                | RJS     | VQA               | 300               | Open-end Strategy        |

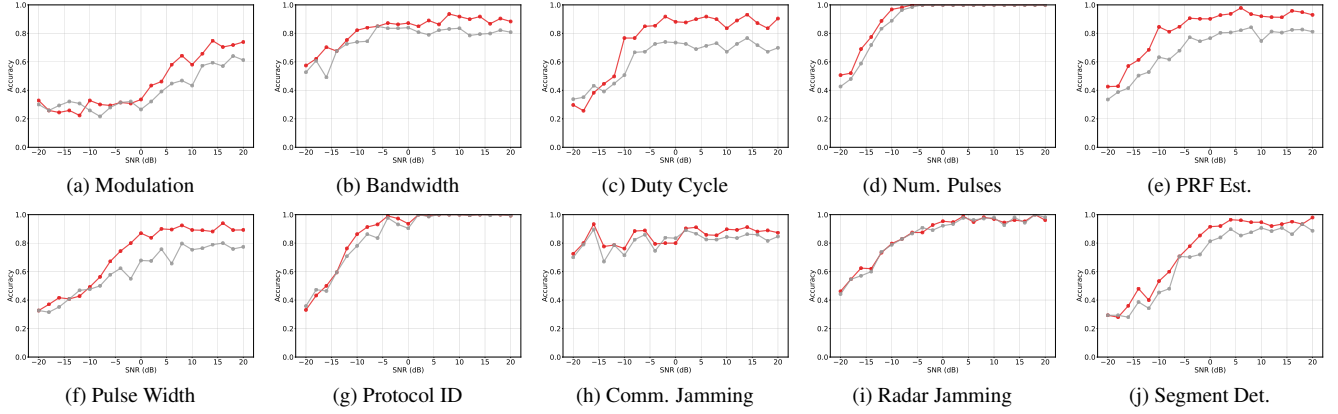

Figure 6. **Detailed performance comparison across 10 sub-tasks.** The red line denotes MERLIN and the gray line denotes the Stage-1 baseline. MERLIN demonstrates significant improvements in complex parameter estimation tasks (e.g., Duty Cycle, Pulse Width) across all SNR levels, while maintaining robust performance in classification tasks.

#### A.4. Detailed Performance Analysis across SNR Levels

Figure 6 provides a comprehensive breakdown of model performance across 10 sub-tasks under varying SNR conditions. The comparison between MERLIN and the Stage-1 baseline reveals distinct behavioral patterns:

- **Superiority in Fine-grained Perception:** In complex parameter estimation tasks such as *Duty Cycle*, *Pulse Width*, and *PRF Estimation*, MERLIN exhibits a consistent and significant performance lead (often  $> 10\%$ ) across the entire SNR spectrum. This indicates that our feature-level distillation not only improves noise robustness but also enhances the model’s fundamental ability to extract subtle signal features that the baseline fails to capture even at high SNRs.
- **Robustness in Modulation and Detection:** For *Modulation Recognition (MOD)* and *Signal Detection (SD)*, MERLIN demonstrates stronger resilience. While both models degrade as noise increases, MERLIN maintains a clearer operational margin in challenging low-SNR environments (e.g.,  $-10$  dB to 0 dB).
- **Performance on Saturated Tasks:** For tasks like *Protocol Identification (PI)* and *Jamming Recognition (RJR)*, both models achieve high accuracy rapidly. However, MERLIN remains competitive and consistently matches or slightly exceeds the baseline, ensuring no degradation in simpler tasks while significantly boosting performance in complex ones.

## A.5. Visualizations of samples

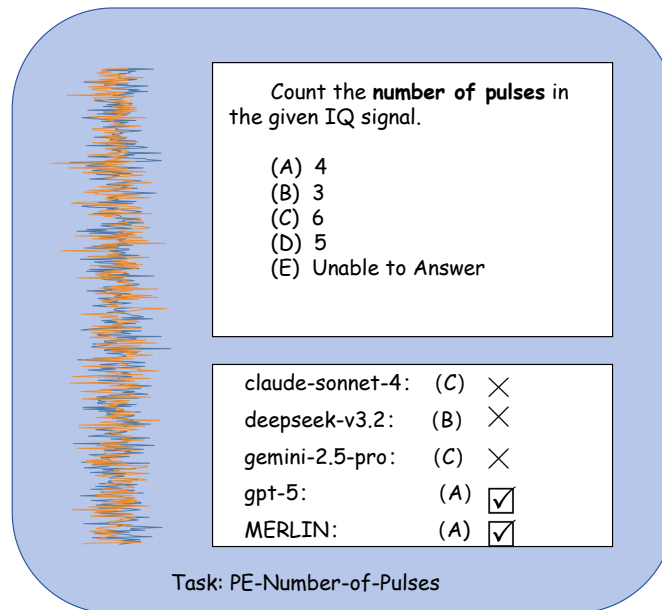

Figure 7. Number-of-Pulses estimation details

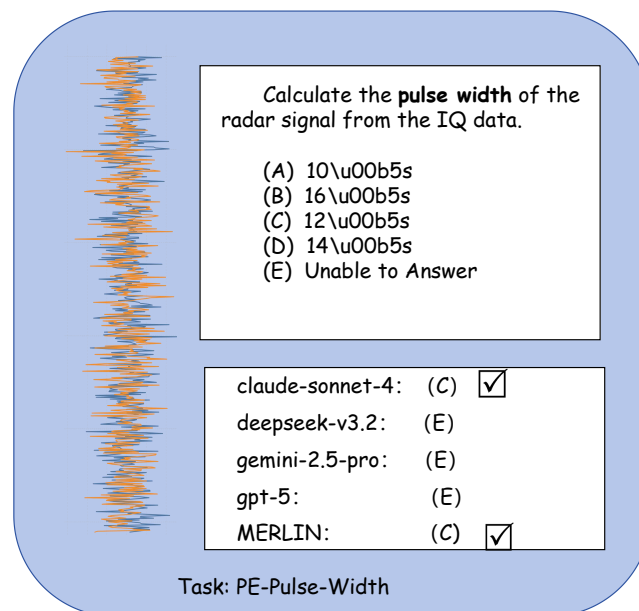

Figure 8. Pulse-Width estimation classification

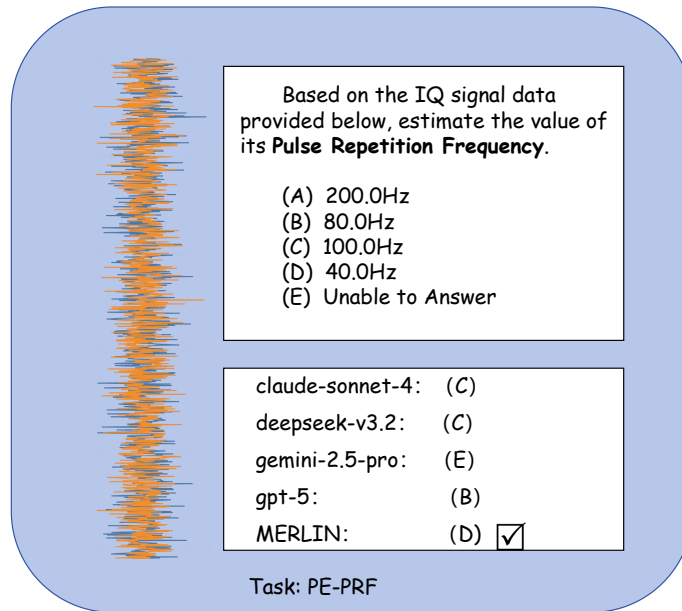

Figure 9. PRF estimation details

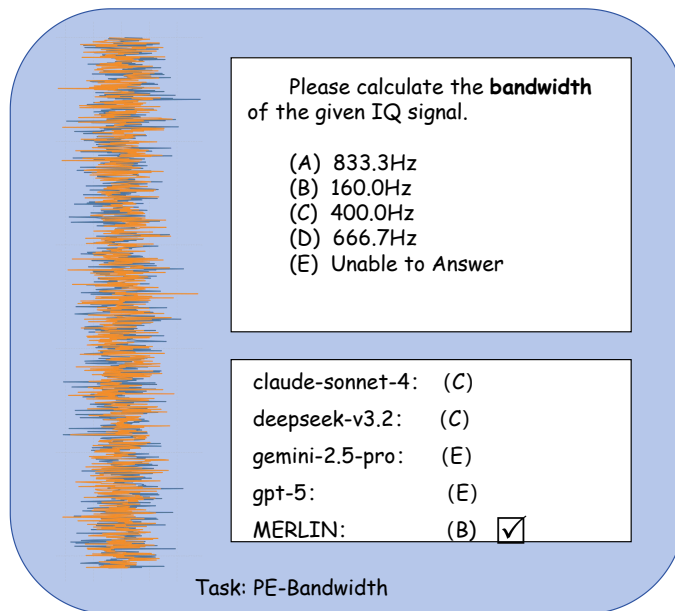

Figure 10. Bandwidth estimation details

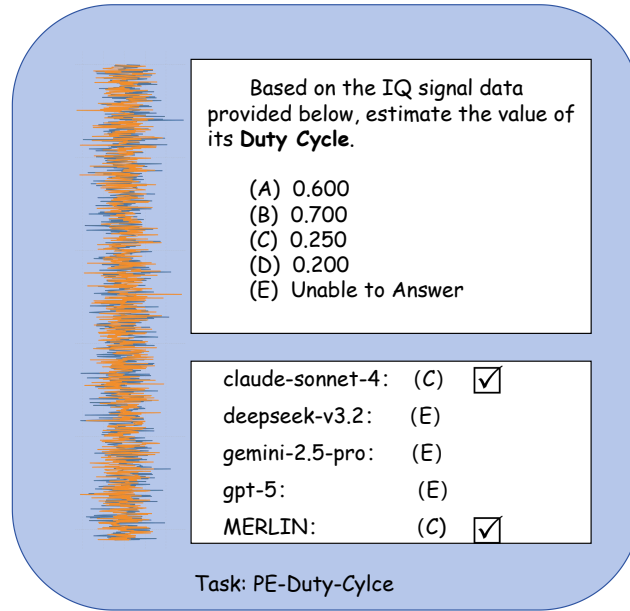

Figure 11. Duty-Cycle estimation details

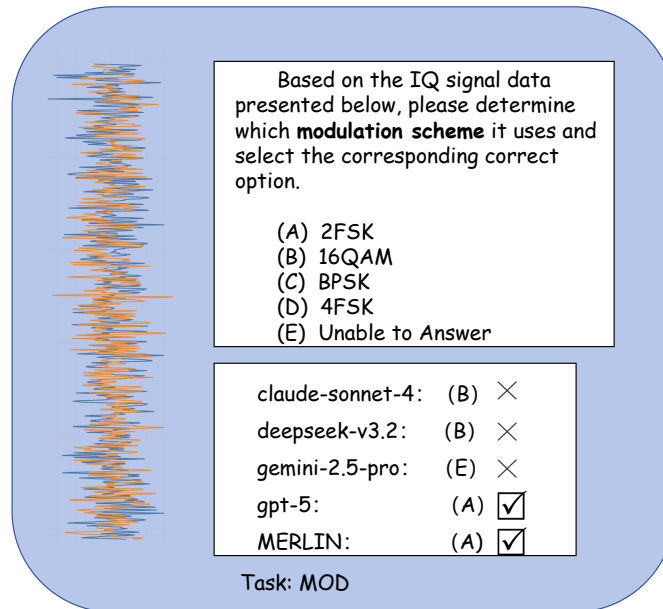

Figure 12. Modulation details

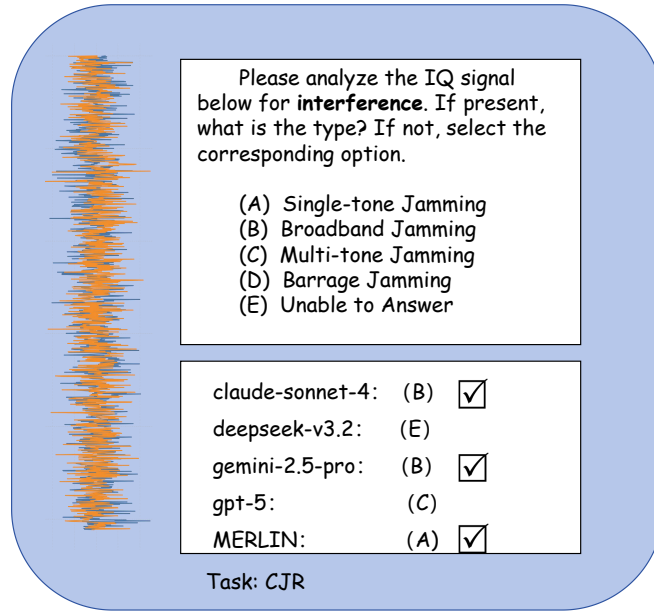

Figure 13. CJR details

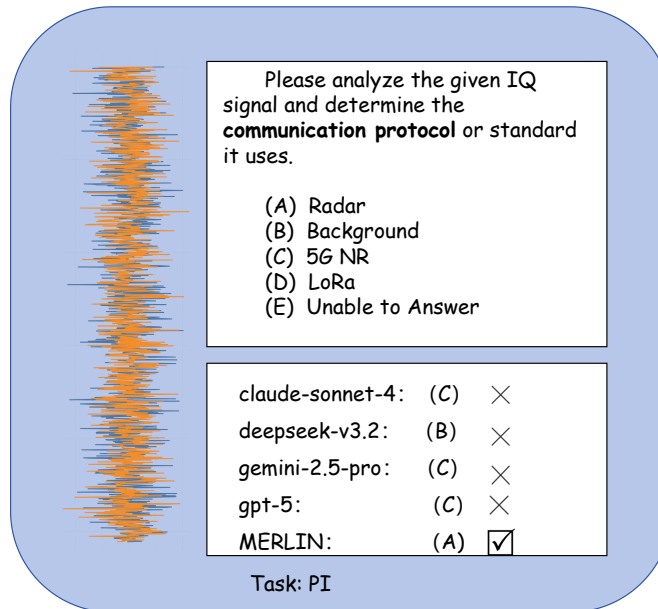

Figure 14. PI details

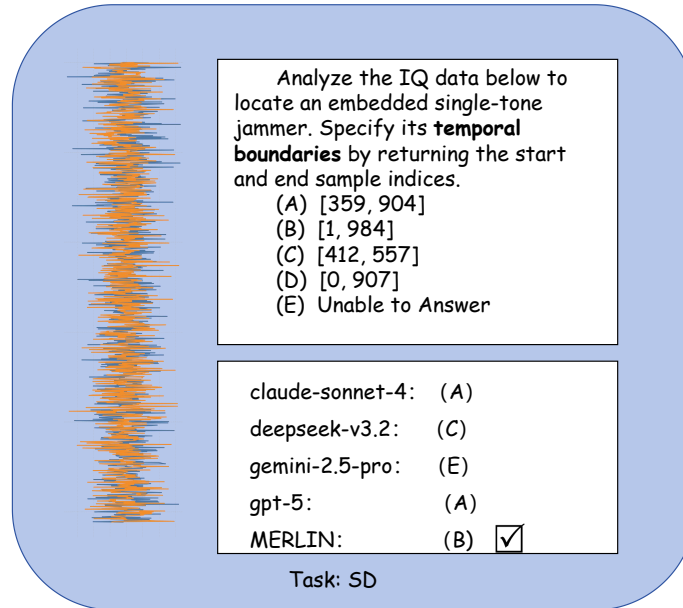

Figure 15. SD details

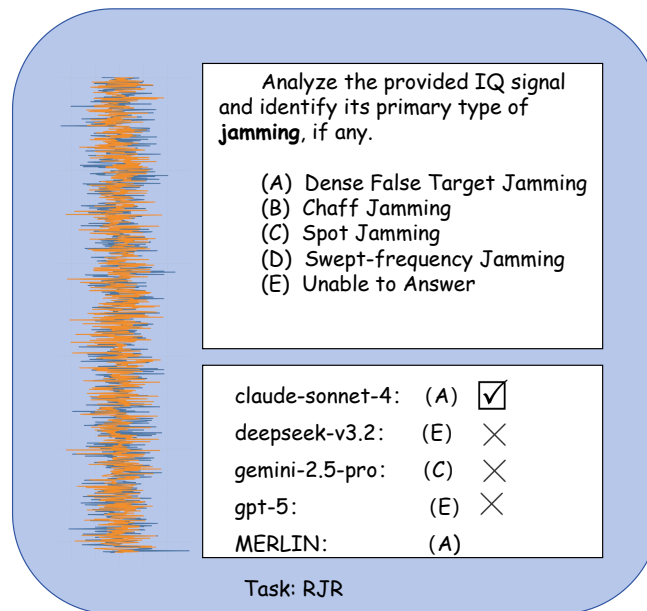

Figure 16. RJR details
